# Supplementary material
Source: MDPI journal article supplement (https://www.mdpi.com/2624-8549/4/2/33)
Supplement: s1 [file s1]

**--Supporting Information--**

**Structures and Bonding in Hexacarbonyl Diiron Polyenes: Cycloheptatriene and 1,3,5-Cyclooctatriene**

*Min Zhang<sup>1</sup>, Guangchao Liang<sup>2\*</sup>*

<sup>1</sup> Department of Pharmacy, Medical School, Xi'an International University, Xi'an, Shaanxi 710077, P.R. China

<sup>2</sup> Academy of Advanced Interdisciplinary Research, Xidian University, Xi'an, Shaanxi 710071, P.R. China

**Table of Contents**

|                                                                                                                                                                                                                 |    |
|-----------------------------------------------------------------------------------------------------------------------------------------------------------------------------------------------------------------|----|
| Table S1. Selected bond lengths (in Å) and angles (in °) for (C <sub>7</sub> H <sub>8</sub> )Fe <sub>2</sub> (CO) <sub>6</sub> and (C <sub>8</sub> H <sub>10</sub> )Fe <sub>2</sub> (CO) <sub>6</sub> .....     | S2 |
| Table S2. Computed proton chemical shifts of (C <sub>7</sub> H <sub>8</sub> )Fe <sub>2</sub> (CO) <sub>6</sub> and (C <sub>8</sub> H <sub>10</sub> )Fe <sub>2</sub> (CO) <sub>6</sub> .....                     | S3 |
| Figure S1. Simulated gas phase <sup>1</sup> H NMR spectra of (C <sub>7</sub> H <sub>8</sub> )Fe <sub>2</sub> (CO) <sub>6</sub> at low temperature limit (bottom, blue) and high temperature fast exchange ..... | S3 |
| Figure S2. Linear fitting between the computed gas phase proton chemical shifts and experimental <sup>1</sup> H NMR of (C <sub>7</sub> H <sub>8</sub> )Fe <sub>2</sub> (CO) <sub>6</sub> . .....                | S4 |
| Table S3. Cartesian coordinates of optimized structures and the computed energies. ....                                                                                                                         | S4 |

**Table S1.** Selected bond lengths (in Å) and angles (in °) for  $(\text{C}_7\text{H}_8)\text{Fe}_2(\text{CO})_6$  and  $(\text{C}_8\text{H}_{10})\text{Fe}_2(\text{CO})_6$

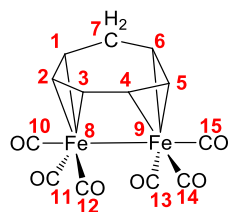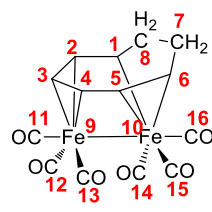

| Parameter   | $(\text{C}_7\text{H}_8)\text{Fe}_2(\text{CO})_6$ |        |
|-------------|--------------------------------------------------|--------|
|             | Expt.                                            | Compt. |
| Fe8-Fe9     | 2.866                                            | 2.868  |
| Fe8-C1      | 2.142                                            | 2.125  |
| Fe8-C2      | 2.043                                            | 2.043  |
| Fe8-C3      | 2.177                                            | 2.199  |
| Fe8-C10     | 1.790                                            | 1.754  |
| Fe8-C11     | 1.786                                            | 1.770  |
| Fe8-C12     | 1.778                                            | 1.772  |
| Fe9-C4      | 2.168                                            | 2.165  |
| Fe9-C5      | 2.041                                            | 2.041  |
| Fe9-C6      | 2.117                                            | 2.128  |
| Fe9-C13     | 1.786                                            | 1.773  |
| Fe9-C14     | 1.801                                            | 1.776  |
| Fe9-C15     | 1.782                                            | 1.750  |
| C2-C3       | 1.402                                            | 1.426  |
| C3-C4       | 1.459                                            | 1.462  |
| C4-C5       | 1.397                                            | 1.422  |
| C2-Fe8-C3   | 38.6                                             | 39.1   |
| C2-Fe8-C10  | 88.1                                             | 86.9   |
| C11-Fe8-C12 | 101.6                                            | 100.9  |
| C4-Fe9-C5   | 38.6                                             | 39.4   |
| C4-Fe9-C15  | 88.0                                             | 88.7   |
| C13-Fe9-C14 | 103.3                                            | 103.3  |

| Parameter    | $(\text{C}_8\text{H}_{10})\text{Fe}_2(\text{CO})_6$ |        |
|--------------|-----------------------------------------------------|--------|
|              | Expt.                                               | Compt. |
| Fe9-Fe10     | 2.767                                               | 2.705  |
| Fe9-C2       | 2.173                                               | 2.146  |
| Fe9-C3       | 2.062                                               | 2.053  |
| Fe9-C4       | 2.124                                               | 2.118  |
| Fe9-C11      | 1.798                                               | 1.760  |
| Fe9-C12      | 1.799                                               | 1.776  |
| Fe9-C13      | 1.800                                               | 1.771  |
| Fe10-C1      | 2.085                                               | 2.098  |
| Fe10-C5      | 2.221                                               | 2.211  |
| Fe10-C6      | 2.181                                               | 2.196  |
| Fe10-C14     | 1.788                                               | 1.760  |
| Fe10-C15     | 1.814                                               | 1.797  |
| Fe10-C16     | 1.790                                               | 1.755  |
| C3-C4        | 1.409                                               | 1.435  |
| C4-C5        | 1.460                                               | 1.463  |
| C5-C6        | 1.411                                               | 1.413  |
| C3-Fe9-C4    | 39.3                                                | 40.2   |
| C3-Fe9-C11   | 88.7                                                | 90.0   |
| C12-Fe9-C13  | 100.0                                               | 99.9   |
| C5-Fe10-C6   | 37.4                                                | 37.4   |
| C6-Fe10-C16  | 80.6                                                | 82.0   |
| C14-Fe10-C15 | 92.4                                                | 92.6   |

**Table S2.** Computed proton chemical shifts of  $(C_7H_8)Fe_2(CO)_6$  and  $(C_8H_{10})Fe_2(CO)_6$

| 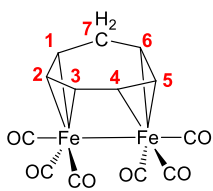 | Chemical shift (ppm)                        | H1  | H6  | H2  | H5  | H3  | H4  | 7N  | 7X  |
|-----------------------------------------------------------------------------------|---------------------------------------------|-----|-----|-----|-----|-----|-----|-----|-----|
|                                                                                   | Experimental high temperature <sup>a</sup>  | 2.7 |     | 4.2 |     | 5.1 |     | 3.0 | 2.2 |
|                                                                                   | Simulated high temperature <sup>b</sup>     | 1.9 |     | 3.5 |     | 4.1 |     | 2.3 | 1.8 |
|                                                                                   | Computed low temperature limit <sup>b</sup> | 1.8 | 2.0 | 3.6 | 3.3 | 4.1 | 4.1 | 2.3 | 1.8 |

| 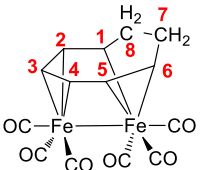 | Chemical shift (ppm)                        | H1   | H6   | H2   | H5   | H3   | H4   | 7N   | 8N   | 7X   | 8X   |
|-----------------------------------------------------------------------------------|---------------------------------------------|------|------|------|------|------|------|------|------|------|------|
|                                                                                   | Experimental high temperature <sup>a</sup>  | 2.65 |      | 3.92 |      | 4.53 |      | 1.53 |      | 2.04 |      |
|                                                                                   | Simulated high temperature <sup>b</sup>     | 2.86 |      | 3.97 |      | 4.52 |      | 1.56 |      | 2.34 |      |
|                                                                                   | Computed low temperature limit <sup>b</sup> | 1.59 | 4.14 | 3.94 | 4.00 | 4.42 | 4.62 | 1.39 | 1.73 | 2.21 | 2.47 |

<sup>a</sup> Experiments in  $CS_2$  solvent at 30°C. <sup>b</sup> Computed gas phase proton chemical shifts. 7N stands for the endo proton of the C7 and 7X for the exo proton.

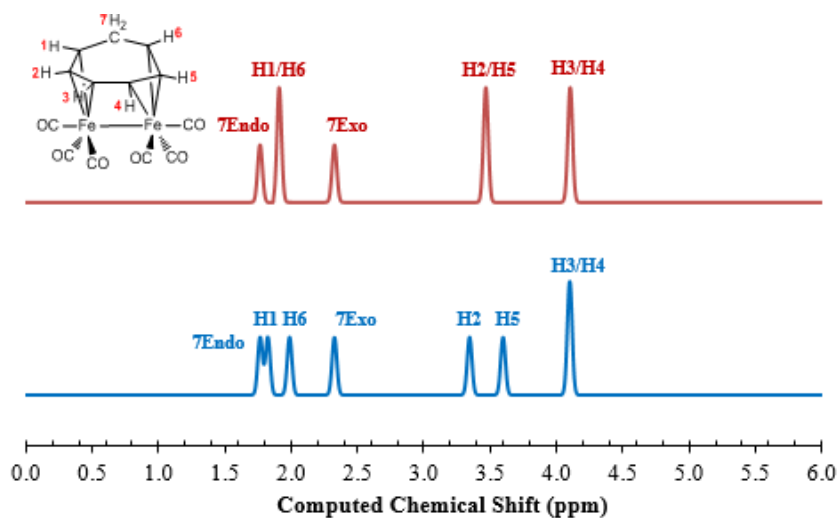

**Figure S1.** Simulated gas phase  $^1H$  NMR spectra of  $(C_7H_8)Fe_2(CO)_6$  at low temperature limit (bottom, blue) and high temperature fast exchange (top, red).

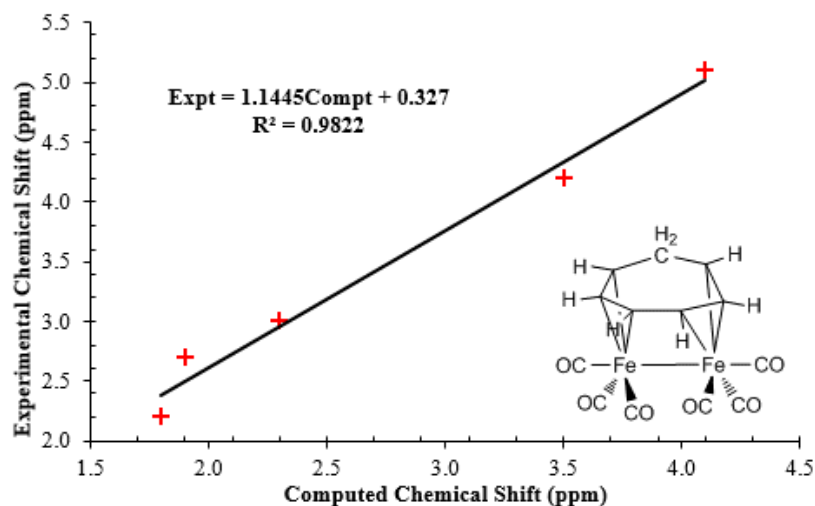

**Figure S2.** Linear fitting between the computed gas phase proton chemical shifts and experimental  $^1\text{H}$  NMR of  $(\text{C}_7\text{H}_8)\text{Fe}_2(\text{CO})_6$ .

**Table S3.** Cartesian coordinates of optimized structures and the computed energies.

32

|                       |                           |           |           |
|-----------------------|---------------------------|-----------|-----------|
| Complex 1 with C8H10, | el energy= -1236.78003096 |           |           |
| Fe                    | 0.365178                  | -1.137894 | 0.292607  |
| Fe                    | -0.096376                 | 1.529894  | -0.272436 |
| C                     | 0.437042                  | -2.888194 | 0.184387  |
| O                     | 0.548548                  | -4.046050 | 0.111347  |
| C                     | 1.635261                  | -0.901588 | -0.902984 |
| O                     | 2.493056                  | -0.885290 | -1.691644 |
| C                     | 1.526607                  | -1.062942 | 1.661351  |
| O                     | 2.295725                  | -1.079008 | 2.533545  |
| C                     | -0.502670                 | 3.240349  | -0.346940 |
| O                     | -0.726675                 | 4.382285  | -0.391253 |
| C                     | 0.848108                  | 1.627887  | -1.773366 |
| O                     | 1.418263                  | 1.785185  | -2.774502 |
| C                     | 1.191471                  | 1.794377  | 0.914535  |
| O                     | 2.024723                  | 2.029654  | 1.692504  |
| C                     | -2.624367                 | -1.943857 | 0.463080  |
| C                     | -1.477448                 | -1.586845 | 1.398436  |
| H                     | -1.213994                 | -2.319130 | 2.172275  |
| C                     | -1.104518                 | -0.254887 | 1.689182  |
| H                     | -0.600769                 | -0.076302 | 2.647930  |

|   |           |           |           |
|---|-----------|-----------|-----------|
| C | -1.631721 | 0.962217  | 1.071256  |
| H | -1.938488 | 1.751170  | 1.771400  |
| C | -2.101102 | 1.086283  | -0.278762 |
| H | -2.754210 | 1.934773  | -0.519819 |
| C | -1.523514 | 0.346878  | -1.353340 |
| H | -1.780298 | 0.727090  | -2.355841 |
| C | -1.025756 | -1.059545 | -1.276083 |
| H | -0.533617 | -1.311785 | -2.230968 |
| C | -2.143935 | -2.078805 | -0.990385 |
| H | -1.740791 | -3.095630 | -1.153461 |
| H | -2.992481 | -1.958196 | -1.698597 |
| H | -3.390136 | -1.145644 | 0.531297  |
| H | -3.107601 | -2.876640 | 0.805252  |

32

Complex li with C8H10, el energy= -1236.78003112

|    |           |           |          |
|----|-----------|-----------|----------|
| C  | 2.484188  | -1.916585 | 4.517954 |
| C  | 2.843527  | 0.091141  | 7.451824 |
| C  | 2.218511  | 1.169308  | 6.757695 |
| C  | 2.889825  | 2.091651  | 5.793163 |
| C  | 3.978098  | 2.960789  | 6.449608 |
| C  | 5.200053  | 2.099496  | 6.805311 |
| C  | 0.527969  | -0.107159 | 5.038861 |
| C  | 1.187168  | -1.891120 | 6.724748 |
| C  | 4.510025  | -0.240676 | 3.132691 |
| C  | 2.349030  | 1.138538  | 3.333845 |
| C  | 4.615136  | 2.293031  | 3.648694 |
| C  | 5.430161  | 1.004994  | 5.772390 |
| C  | 4.845314  | -0.278414 | 5.864069 |
| C  | 3.852545  | -0.725971 | 6.841557 |
| Fe | 3.787470  | 0.898272  | 4.319580 |
| Fe | 2.044015  | -0.711666 | 5.739328 |
| O  | 2.742476  | -2.751661 | 3.749275 |
| O  | -0.515254 | 0.239203  | 4.659663 |
| O  | 0.606303  | -2.692345 | 7.338572 |
| O  | 4.996629  | -0.924079 | 2.327273 |
| O  | 1.469003  | 1.400047  | 2.616043 |
| O  | 5.143588  | 3.201620  | 3.145122 |
| H  | 2.383563  | -0.268942 | 8.380979 |
| H  | 1.289532  | 1.533451  | 7.226663 |
| H  | 2.124188  | 2.742939  | 5.337843 |
| H  | 4.276929  | 3.748175  | 5.732826 |
| H  | 3.589668  | 3.484629  | 7.350113 |
| H  | 6.107497  | 2.723222  | 6.895599 |
| H  | 5.044733  | 1.619470  | 7.792024 |

|   |          |           |          |
|---|----------|-----------|----------|
| H | 6.363032 | 1.046984  | 5.195800 |
| H | 5.371447 | -1.102775 | 5.365651 |
| H | 4.076537 | -1.680384 | 7.337170 |

32

Complex 2 with C<sub>8</sub>H<sub>10</sub>, el energy= -1236.75954294

|    |          |           |           |
|----|----------|-----------|-----------|
| Fe | 2.649765 | 2.176486  | 1.825009  |
| Fe | 4.866698 | 1.370179  | 3.565986  |
| C  | 1.714294 | 2.635741  | 0.419081  |
| O  | 1.076366 | 2.890430  | -0.523150 |
| C  | 3.636705 | 1.205043  | 0.713356  |
| O  | 4.175203 | 0.552659  | -0.088551 |
| C  | 1.504037 | 0.962034  | 2.404698  |
| O  | 0.662586 | 0.208801  | 2.694064  |
| C  | 6.107294 | 0.640967  | 4.562168  |
| O  | 6.916598 | 0.119683  | 5.218635  |
| C  | 6.012341 | 1.284119  | 2.205570  |
| O  | 6.827391 | 1.234997  | 1.377399  |
| C  | 3.906196 | -0.118829 | 3.438525  |
| O  | 3.394373 | -1.165004 | 3.463688  |
| C  | 2.245900 | 2.209911  | 5.290086  |
| C  | 3.752632 | 2.035854  | 5.266679  |
| H  | 4.084562 | 1.474334  | 6.153175  |
| C  | 4.769696 | 2.961291  | 4.839189  |
| H  | 5.655846 | 3.053666  | 5.483381  |
| C  | 4.970461 | 3.503249  | 3.532957  |
| H  | 5.987035 | 3.898989  | 3.395900  |
| C  | 4.102726 | 3.831734  | 2.401531  |
| H  | 4.690479 | 4.180494  | 1.541375  |
| C  | 2.721801 | 4.158709  | 2.306044  |
| H  | 2.448479 | 4.789903  | 1.450741  |
| C  | 1.681894 | 3.589869  | 3.114834  |
| H  | 0.681341 | 3.821033  | 2.723051  |
| C  | 1.690421 | 3.474820  | 4.634686  |
| H  | 0.641024 | 3.574892  | 4.968691  |
| H  | 2.227149 | 4.349532  | 5.055426  |
| H  | 1.967695 | 2.255998  | 6.364355  |
| H  | 1.733036 | 1.314517  | 4.898051  |

32

Complex 3 with C<sub>8</sub>H<sub>10</sub>, el energy= -1236.73779495

|    |          |          |           |
|----|----------|----------|-----------|
| Fe | 4.253763 | 1.594108 | 1.774354  |
| Fe | 3.005772 | 0.859361 | 4.022928  |
| C  | 3.382179 | 2.747141 | 0.725660  |
| O  | 2.940268 | 3.424434 | -0.118984 |

|   |          |           |          |
|---|----------|-----------|----------|
| C | 5.836690 | 1.394533  | 1.010522 |
| O | 6.842276 | 1.259858  | 0.436014 |
| C | 3.573585 | 0.327492  | 0.753665 |
| O | 3.155943 | -0.487480 | 0.036304 |
| C | 2.879768 | -0.512567 | 5.117489 |
| O | 2.759866 | -1.438996 | 5.813520 |
| C | 4.379676 | -0.010744 | 3.044258 |
| O | 5.071755 | -0.974806 | 3.069100 |
| C | 1.671121 | 0.292227  | 3.036341 |
| O | 0.751031 | -0.084918 | 2.427457 |
| C | 2.184814 | 4.007703  | 3.160712 |
| C | 1.803609 | 2.780203  | 3.950649 |
| H | 0.733790 | 2.562126  | 3.809507 |
| C | 2.257401 | 2.389072  | 5.238674 |
| H | 1.520412 | 2.077503  | 5.990759 |
| C | 3.626028 | 2.132704  | 5.593356 |
| H | 3.763037 | 1.729622  | 6.605970 |
| C | 4.767258 | 1.983718  | 4.761236 |
| H | 5.548791 | 1.398357  | 5.265807 |
| C | 5.263918 | 2.542802  | 3.494601 |
| H | 6.311318 | 2.279507  | 3.314230 |
| C | 4.728990 | 3.583521  | 2.714454 |
| H | 5.430944 | 4.023922  | 1.996396 |
| C | 3.629148 | 4.509428  | 3.200919 |
| H | 3.672612 | 5.440708  | 2.608329 |
| H | 3.878380 | 4.793132  | 4.245120 |
| H | 1.542576 | 4.824901  | 3.559030 |
| H | 1.860080 | 3.872906  | 2.115973 |

32

TS-1 with C8H10, el energy= -1236.76599278

|    |           |           |           |
|----|-----------|-----------|-----------|
| Fe | 1.459366  | -0.052140 | -0.371126 |
| Fe | -0.524557 | 1.902686  | 0.038423  |
| C  | 2.413150  | -1.448999 | -0.812900 |
| O  | 3.100602  | -2.342714 | -1.107872 |
| C  | 2.062700  | 0.887787  | -1.738986 |
| O  | 2.480332  | 1.409201  | -2.691102 |
| C  | 2.659082  | 0.524378  | 0.847315  |
| O  | 3.473033  | 0.869677  | 1.600844  |
| C  | -1.258990 | 3.027306  | -1.088867 |
| O  | -1.761765 | 3.784531  | -1.817770 |
| C  | 1.053714  | 2.687937  | -0.098907 |
| O  | 1.966783  | 3.418985  | -0.124516 |
| C  | -0.931803 | 2.836751  | 1.468685  |
| O  | -1.237581 | 3.478693  | 2.392603  |

|   |           |           |           |
|---|-----------|-----------|-----------|
| C | -0.442584 | -2.460330 | -0.059447 |
| C | 0.475304  | -1.598173 | 0.797957  |
| H | 1.255348  | -2.109708 | 1.376184  |
| C | 0.027327  | -0.378996 | 1.372378  |
| H | 0.529249  | -0.049291 | 2.291375  |
| C | -1.264825 | 0.257217  | 1.149980  |
| H | -1.838612 | 0.509508  | 2.051559  |
| C | -1.929034 | 0.394038  | -0.106057 |
| H | -2.962564 | 0.761264  | -0.103599 |
| C | -1.215257 | 0.345583  | -1.350624 |
| H | -1.788745 | 0.733410  | -2.207073 |
| C | -0.081361 | -0.552578 | -1.696513 |
| H | 0.211104  | -0.353783 | -2.741038 |
| C | -0.374473 | -2.055891 | -1.541638 |
| H | 0.440291  | -2.615121 | -2.038810 |
| H | -1.312184 | -2.332427 | -2.069744 |
| H | -1.478642 | -2.344172 | 0.315713  |
| H | -0.178415 | -3.525728 | 0.065002  |

32

TS-2 with C8H10, el energy= -1236.75783575

|    |           |           |           |
|----|-----------|-----------|-----------|
| Fe | 2.713583  | 2.145454  | 1.961013  |
| Fe | 4.717359  | 1.004872  | 3.577178  |
| C  | 1.059027  | 1.619153  | 2.137764  |
| O  | -0.047728 | 1.254877  | 2.214719  |
| C  | 2.378699  | 2.754093  | 0.350069  |
| O  | 2.100529  | 3.151986  | -0.710820 |
| C  | 3.271508  | 0.642104  | 1.212591  |
| O  | 3.472421  | -0.306006 | 0.556752  |
| C  | 5.830777  | 0.346905  | 4.762056  |
| O  | 6.558940  | -0.128692 | 5.535837  |
| C  | 5.822781  | 0.546424  | 2.252063  |
| O  | 6.587781  | 0.260190  | 1.426885  |
| C  | 3.592092  | -0.369657 | 3.724957  |
| O  | 2.876589  | -1.269814 | 3.889820  |
| C  | 1.680956  | 3.862455  | 4.179863  |
| C  | 2.210710  | 2.425432  | 4.063794  |
| H  | 1.447590  | 1.715843  | 4.425218  |
| C  | 3.455885  | 2.150999  | 4.836240  |
| H  | 3.310900  | 1.724226  | 5.842296  |
| C  | 4.737775  | 2.758888  | 4.637655  |
| H  | 5.440940  | 2.779769  | 5.480539  |
| C  | 5.245237  | 3.056519  | 3.336509  |
| H  | 6.325631  | 3.245598  | 3.267996  |
| C  | 4.444168  | 3.478532  | 2.185918  |



|   |          |          |          |
|---|----------|----------|----------|
| H | 4.986067 | 3.468830 | 1.231736 |
| C | 3.247585 | 4.247579 | 2.251709 |
| H | 3.018104 | 4.809650 | 1.337688 |
| C | 2.675368 | 4.830670 | 3.535962 |
| H | 2.195484 | 5.802661 | 3.322103 |
| H | 3.508255 | 5.034667 | 4.239702 |
| H | 1.487205 | 4.130528 | 5.242338 |
| H | 0.712333 | 3.920815 | 3.649700 |

32

TS-3 with C8H10, el energy= -1236.76328661

|    |          |           |           |
|----|----------|-----------|-----------|
| Fe | 2.731900 | 1.890659  | 2.093046  |
| Fe | 4.963129 | 1.183562  | 3.714106  |
| C  | 1.368489 | 2.618517  | 1.296732  |
| O  | 0.452266 | 3.086343  | 0.747614  |
| C  | 3.544403 | 1.438757  | 0.571638  |
| O  | 3.982631 | 1.179199  | -0.475167 |
| C  | 1.935299 | 0.308127  | 2.293236  |
| O  | 1.330601 | -0.684238 | 2.362269  |
| C  | 6.337670 | 0.781064  | 4.734497  |
| O  | 7.249667 | 0.494547  | 5.398736  |
| C  | 5.815650 | 0.733125  | 2.230032  |
| O  | 6.440099 | 0.424375  | 1.298171  |
| C  | 4.205709 | -0.398093 | 3.952525  |
| O  | 3.765494 | -1.454925 | 4.159760  |
| C  | 1.800989 | 4.127060  | 3.864128  |
| C  | 1.944469 | 2.600414  | 3.900009  |
| H  | 0.987118 | 2.096616  | 4.097942  |
| C  | 2.991046 | 2.033940  | 4.736337  |
| H  | 2.671805 | 1.220696  | 5.405325  |
| C  | 4.270225 | 2.584897  | 5.081142  |
| H  | 4.644628 | 2.421894  | 6.098947  |
| C  | 5.157777 | 3.208533  | 4.131539  |
| H  | 6.160656 | 3.487125  | 4.476932  |
| C  | 4.862063 | 3.348602  | 2.734515  |
| H  | 5.760536 | 3.390980  | 2.100658  |
| C  | 3.628821 | 3.783917  | 2.097902  |
| H  | 3.826035 | 4.091369  | 1.060554  |
| C  | 2.751871 | 4.795194  | 2.846769  |
| H  | 2.158587 | 5.343672  | 2.092705  |
| H  | 3.395361 | 5.551627  | 3.340646  |
| H  | 1.954345 | 4.539103  | 4.882405  |
| H  | 0.753734 | 4.356558  | 3.595772  |

32

TS-1-2 with C8H10, el energy= -1236.73115006

|    |           |           |           |
|----|-----------|-----------|-----------|
| Fe | 0.028855  | -0.159296 | -0.164489 |
| Fe | -2.857324 | -0.208164 | -0.254738 |
| C  | 1.723779  | 0.108869  | -0.365713 |
| O  | 2.873408  | 0.287767  | -0.473676 |
| C  | -0.214610 | 1.604469  | -0.245804 |
| O  | -0.242946 | 2.771054  | -0.287419 |
| C  | 0.256576  | -0.517325 | 1.566403  |
| O  | 0.478735  | -0.681179 | 2.701941  |
| C  | -4.588393 | -0.181447 | 0.041766  |
| O  | -5.734233 | -0.145197 | 0.242973  |
| C  | -2.934194 | 1.321550  | -1.152957 |
| O  | -3.070708 | 2.305382  | -1.755497 |
| C  | -2.483210 | 0.496240  | 1.331258  |
| O  | -2.373628 | 0.971842  | 2.386963  |
| C  | -0.658145 | -3.209208 | 0.445282  |
| C  | -1.855025 | -2.300201 | 0.645371  |
| H  | -2.177800 | -2.273635 | 1.697369  |
| C  | -2.958047 | -2.272715 | -0.273162 |
| H  | -3.929397 | -2.663975 | 0.060780  |
| C  | -2.901736 | -1.771133 | -1.624660 |
| H  | -3.828091 | -1.844616 | -2.208708 |
| C  | -1.880557 | -0.932258 | -2.184485 |
| H  | -2.257414 | -0.383592 | -3.060398 |
| C  | -0.430266 | -0.860040 | -2.065443 |
| H  | 0.034728  | -0.221289 | -2.825834 |
| C  | 0.404478  | -1.818342 | -1.387050 |
| H  | 1.435866  | -1.816185 | -1.766162 |
| C  | -0.061223 | -3.199932 | -0.950355 |
| H  | 0.793985  | -3.898936 | -0.977476 |
| H  | -0.806154 | -3.586771 | -1.677923 |
| H  | -1.046603 | -4.229670 | 0.682747  |
| H  | 0.119766  | -2.989138 | 1.194226  |

32

TS-1-3 with C8H10, el energy= -1236.73708438

|    |          |           |           |
|----|----------|-----------|-----------|
| Fe | 3.048745 | 2.055213  | 1.600779  |
| Fe | 4.413883 | 1.215670  | 3.785416  |
| C  | 1.386722 | 2.666314  | 1.419304  |
| O  | 0.326779 | 3.030648  | 1.084584  |
| C  | 3.601624 | 2.279627  | -0.066263 |
| O  | 3.880625 | 2.364056  | -1.193858 |
| C  | 2.327388 | 0.461330  | 1.395780  |
| O  | 1.841189 | -0.582806 | 1.228482  |
| C  | 5.952062 | 0.477789  | 4.175839  |

|   |          |           |          |
|---|----------|-----------|----------|
| O | 6.964933 | -0.028670 | 4.448718 |
| C | 4.724449 | 0.920841  | 1.927013 |
| O | 5.484816 | 0.348533  | 1.217502 |
| C | 3.615907 | -0.324682 | 4.081454 |
| O | 3.106502 | -1.346860 | 4.309300 |
| C | 1.672233 | 3.393540  | 4.250674 |
| C | 2.512121 | 2.187101  | 4.634428 |
| H | 1.856827 | 1.377864  | 4.990225 |
| C | 3.710770 | 2.310075  | 5.414895 |
| H | 3.801667 | 1.807574  | 6.387534 |
| C | 4.896888 | 2.915079  | 4.902541 |
| H | 5.770570 | 2.901173  | 5.568421 |
| C | 5.200279 | 3.201472  | 3.527749 |
| H | 6.282983 | 3.276281  | 3.356231 |
| C | 4.437636 | 3.652552  | 2.355088 |
| H | 5.074566 | 3.803843  | 1.476832 |
| C | 3.148170 | 4.203030  | 2.305874 |
| H | 2.916412 | 4.767652  | 1.394329 |
| C | 2.369042 | 4.564025  | 3.554296 |
| H | 1.609441 | 5.325424  | 3.303146 |
| H | 3.075416 | 5.041479  | 4.264959 |
| H | 1.242934 | 3.770999  | 5.206444 |
| H | 0.810973 | 3.059388  | 3.650132 |

32

TS-2-3 with C8H10, el energy= -1236.73719230

|    |           |           |           |
|----|-----------|-----------|-----------|
| Fe | 2.744691  | -0.429401 | -0.825073 |
| Fe | 0.096228  | -0.739209 | -0.597685 |
| C  | 3.666393  | -1.294684 | 0.416996  |
| O  | 4.427562  | -1.747099 | 1.181505  |
| C  | 3.926456  | 0.300177  | -1.911288 |
| O  | 4.764252  | 0.769406  | -2.575176 |
| C  | 2.843073  | 1.047077  | 0.143713  |
| O  | 2.988031  | 2.014492  | 0.775358  |
| C  | -1.467362 | 0.067278  | -0.497530 |
| O  | -2.473939 | 0.643573  | -0.387105 |
| C  | 0.861734  | 0.726670  | -1.372861 |
| O  | 0.815792  | 1.742559  | -1.970437 |
| C  | 0.595587  | -0.427807 | 1.061379  |
| O  | 0.781294  | -0.238072 | 2.199002  |
| C  | 1.576238  | -3.540534 | 0.297442  |
| C  | 0.250174  | -2.827171 | 0.281537  |
| H  | -0.233689 | -2.883530 | 1.268629  |
| C  | -0.698690 | -2.662749 | -0.756866 |
| H  | -1.760390 | -2.765649 | -0.496052 |

|   |           |           |           |
|---|-----------|-----------|-----------|
| C | -0.467811 | -2.144218 | -2.083380 |
| H | -1.387261 | -1.975700 | -2.658897 |
| C | 0.677779  | -1.521595 | -2.640422 |
| H | 0.394212  | -0.897088 | -3.500381 |
| C | 2.136532  | -1.606872 | -2.525354 |
| H | 2.642344  | -1.172866 | -3.394537 |
| C | 2.908267  | -2.450147 | -1.688259 |
| H | 3.957862  | -2.533698 | -1.996803 |
| C | 2.364326  | -3.691877 | -1.002915 |
| H | 3.217975  | -4.358523 | -0.784756 |
| H | 1.733212  | -4.232298 | -1.739868 |
| H | 1.350504  | -4.565293 | 0.666961  |
| H | 2.214511  | -3.089786 | 1.077388  |

29

Complex 1 with C7H8, el energy= -1197.52966929

|    |          |           |           |
|----|----------|-----------|-----------|
| C  | 0.994078 | -0.522206 | 3.410443  |
| C  | 1.540510 | 1.352928  | 0.821096  |
| C  | 2.244872 | -0.573961 | -0.756575 |
| C  | 4.116696 | 0.710461  | 0.179515  |
| C  | 1.163917 | -1.024850 | 1.996806  |
| C  | 2.978357 | 2.197819  | 2.999171  |
| C  | 4.507385 | 1.315111  | 4.863125  |
| C  | 5.469020 | 1.010801  | 2.631862  |
| C  | 2.177700 | -1.903920 | 1.499229  |
| C  | 3.560721 | -1.777778 | 1.823626  |
| C  | 4.126310 | -1.431523 | 3.126263  |
| C  | 3.418801 | -1.042262 | 4.297301  |
| C  | 2.213666 | -0.263512 | 4.262158  |
| Fe | 2.652970 | -0.022908 | 0.858223  |
| Fe | 3.872777 | 0.707086  | 3.349507  |
| H  | 0.375855 | 0.394822  | 3.387015  |
| H  | 0.367847 | -1.271964 | 3.952485  |
| H  | 0.200329 | -1.124348 | 1.475789  |
| H  | 1.922723 | -2.583479 | 0.676017  |
| H  | 4.249688 | -2.316997 | 1.160865  |
| H  | 5.153208 | -1.784535 | 3.287259  |
| H  | 3.945753 | -1.160978 | 5.252907  |
| H  | 1.938817 | 0.162903  | 5.238179  |
| O  | 0.737828 | 2.187778  | 0.703859  |
| O  | 1.966451 | -0.889988 | -1.843306 |
| O  | 5.030003 | 1.186399  | -0.363155 |
| O  | 2.459392 | 3.239108  | 2.929009  |
| O  | 4.912280 | 1.759982  | 5.861304  |
| O  | 6.550046 | 1.211009  | 2.251024  |

29

Complex 2 with C7H8, el energy= -1197.52130053

|    |          |           |           |
|----|----------|-----------|-----------|
| C  | 2.293343 | -1.056133 | 4.588573  |
| C  | 1.591673 | 1.327133  | 0.382210  |
| C  | 2.228615 | -0.842537 | -0.758287 |
| C  | 4.178534 | 0.519037  | 0.162271  |
| C  | 1.712057 | -0.014687 | 3.614828  |
| C  | 2.900238 | 2.343051  | 2.614986  |
| C  | 3.733433 | 1.455600  | 4.836633  |
| C  | 5.283049 | 1.260733  | 2.759304  |
| C  | 1.212500 | -0.601315 | 2.351327  |
| C  | 1.861314 | -1.705721 | 1.725483  |
| C  | 3.295216 | -1.808463 | 1.772946  |
| C  | 4.144940 | -1.327646 | 2.866438  |
| C  | 3.759337 | -1.066214 | 4.194282  |
| Fe | 2.622182 | -0.069300 | 0.770047  |
| Fe | 3.593117 | 0.830430  | 3.199570  |
| H  | 2.189726 | -0.708085 | 5.631545  |
| H  | 1.815422 | -2.057602 | 4.513132  |
| H  | 1.007795 | 0.700334  | 4.062065  |
| H  | 0.163699 | -0.423326 | 2.073747  |
| H  | 1.297399 | -2.376539 | 1.067166  |
| H  | 3.765176 | -2.550318 | 1.114137  |
| H  | 5.221910 | -1.421413 | 2.674762  |
| H  | 4.546990 | -1.069713 | 4.957920  |
| O  | 0.875552 | 2.180383  | 0.048055  |
| O  | 1.984641 | -1.319529 | -1.792525 |
| O  | 5.185473 | 0.870690  | -0.304345 |
| O  | 2.462422 | 3.393511  | 2.365497  |
| O  | 3.849879 | 1.928260  | 5.895459  |
| O  | 6.382241 | 1.576064  | 2.548926  |

29

Complex 3 with C7H8, el energy= -1197.50209099

|   |          |           |           |
|---|----------|-----------|-----------|
| C | 0.884717 | -0.512136 | 3.347133  |
| C | 2.769761 | 1.994155  | 1.096654  |
| C | 3.681031 | 0.310990  | -0.561579 |
| C | 4.778170 | 0.193091  | 1.794281  |
| C | 0.972466 | 0.125489  | 1.963262  |
| C | 2.571912 | 1.548694  | 4.263456  |
| C | 4.923169 | -0.195160 | 4.760653  |
| C | 4.869528 | 1.916067  | 3.506292  |
| C | 1.147853 | -0.617471 | 0.766258  |
| C | 2.168500 | -1.623586 | 0.707615  |

|    |          |           |           |
|----|----------|-----------|-----------|
| C  | 3.151371 | -1.825043 | 1.716804  |
| C  | 3.167158 | -1.607775 | 3.176180  |
| C  | 2.196204 | -0.947927 | 3.952979  |
| Fe | 3.017371 | 0.252846  | 1.065373  |
| Fe | 3.833301 | 0.492768  | 3.551705  |
| H  | 0.371964 | 0.185665  | 4.030508  |
| H  | 0.227911 | -1.407421 | 3.280947  |
| H  | 0.367630 | 1.035713  | 1.857034  |
| H  | 0.624367 | -0.352040 | -0.159875 |
| H  | 2.344556 | -2.125034 | -0.252197 |
| H  | 4.010003 | -2.415722 | 1.370871  |
| H  | 3.895964 | -2.234777 | 3.701440  |
| H  | 2.203349 | -1.147103 | 5.031918  |
| O  | 2.576290 | 3.143008  | 1.086660  |
| O  | 4.107696 | 0.384191  | -1.642783 |
| O  | 5.905761 | 0.011798  | 1.472713  |
| O  | 1.836885 | 2.271892  | 4.808779  |
| O  | 5.613456 | -0.602403 | 5.608490  |
| O  | 5.554000 | 2.855726  | 3.522141  |

29

TS-1 with C7H8, el energy= -1197.52972015

|    |           |           |           |
|----|-----------|-----------|-----------|
| C  | 2.226305  | 0.049957  | 0.000000  |
| C  | -0.046889 | 2.037439  | 1.367871  |
| C  | -0.620556 | 0.313293  | 3.187723  |
| C  | -2.285697 | 0.425120  | 1.403154  |
| C  | 1.527814  | -0.247529 | 1.305064  |
| C  | -0.046889 | 2.037439  | -1.367871 |
| C  | -0.620556 | 0.313293  | -3.187723 |
| C  | -2.285697 | 0.425120  | -1.403154 |
| C  | 0.646691  | -1.342399 | 1.587554  |
| C  | -0.423565 | -1.728176 | 0.730873  |
| C  | -0.423565 | -1.728176 | -0.730873 |
| C  | 0.646691  | -1.342399 | -1.587554 |
| C  | 1.527814  | -0.247529 | -1.305064 |
| Fe | -0.514229 | 0.329940  | 1.439048  |
| Fe | -0.514229 | 0.329940  | -1.439048 |
| H  | 2.540314  | 1.110705  | 0.000000  |
| H  | 3.182211  | -0.528370 | 0.000000  |
| H  | 2.129663  | 0.066832  | 2.170417  |
| H  | 0.649650  | -1.773046 | 2.597226  |
| H  | -1.180365 | -2.380538 | 1.185457  |
| H  | -1.180365 | -2.380538 | -1.185457 |
| H  | 0.649650  | -1.773046 | -2.597226 |
| H  | 2.129663  | 0.066832  | -2.170417 |

|   |           |          |           |
|---|-----------|----------|-----------|
| O | 0.283626  | 3.148596 | 1.477604  |
| O | -0.695611 | 0.349254 | 4.350260  |
| O | -3.444949 | 0.485068 | 1.484631  |
| O | 0.283626  | 3.148596 | -1.477604 |
| O | -0.695611 | 0.349254 | -4.350260 |
| O | -3.444949 | 0.485068 | -1.484631 |

29

TS-2 with C7H8, el energy= -1197.51532834

|    |           |           |           |
|----|-----------|-----------|-----------|
| C  | 0.126933  | -0.056115 | -0.427171 |
| C  | -1.370744 | 3.276372  | -0.704261 |
| C  | -3.941659 | 2.839696  | -0.670179 |
| C  | -3.011305 | 2.317752  | -2.900663 |
| C  | -0.571747 | 0.601600  | 0.738568  |
| C  | -0.284677 | 2.524121  | -2.950287 |
| C  | 1.559198  | 1.085699  | -2.190676 |
| C  | -0.078563 | 0.222869  | -4.034337 |
| C  | -2.006545 | 1.049859  | 0.598860  |
| C  | -3.056706 | 0.389006  | -0.120066 |
| C  | -2.895937 | -0.123628 | -1.438711 |
| C  | -1.703959 | -0.722175 | -2.022396 |
| C  | -0.432098 | -0.932716 | -1.409574 |
| Fe | -2.504010 | 2.008416  | -1.221275 |
| Fe | -0.155830 | 0.854354  | -2.386097 |
| H  | 0.036294  | 1.464917  | 1.068212  |
| H  | 1.170623  | -0.294860 | -0.176434 |
| H  | -0.530543 | -0.115796 | 1.594581  |
| H  | -2.356274 | 1.587466  | 1.492654  |
| H  | -4.082573 | 0.451836  | 0.264572  |
| H  | -3.827542 | -0.351033 | -1.972492 |
| H  | -1.904781 | -1.336876 | -2.909064 |
| H  | 0.210653  | -1.703197 | -1.852200 |
| O  | -0.708442 | 4.121911  | -0.254321 |
| O  | -4.876670 | 3.432234  | -0.306228 |
| O  | -3.389775 | 2.500055  | -3.984872 |
| O  | -0.198797 | 3.569187  | -3.468404 |
| O  | 2.712445  | 1.226873  | -2.083115 |
| O  | 0.026334  | -0.196963 | -5.116121 |

29

TS-1-3 with C7H8, el energy= -1197.50106266

|   |           |           |           |
|---|-----------|-----------|-----------|
| C | -0.654472 | 2.637015  | 0.372637  |
| C | 0.816323  | -0.252369 | 1.744706  |
| C | 2.932539  | -0.503126 | 0.249317  |
| C | 0.702226  | -1.320162 | -0.766681 |

|    |           |           |           |
|----|-----------|-----------|-----------|
| C  | 0.729727  | 2.198043  | 0.815618  |
| C  | -2.141080 | 0.287221  | 1.182313  |
| C  | -2.406980 | -0.930185 | -1.428188 |
| C  | -1.333816 | -1.965057 | 0.522315  |
| C  | 1.892802  | 2.156994  | 0.006367  |
| C  | 1.857842  | 1.610594  | -1.324221 |
| C  | 0.726736  | 0.973409  | -1.894545 |
| C  | -0.724173 | 1.119427  | -1.704695 |
| C  | -1.379202 | 1.773797  | -0.633852 |
| Fe | 1.308592  | 0.166716  | 0.104286  |
| Fe | -1.265697 | -0.360045 | -0.212320 |
| H  | -1.287530 | 2.759909  | 1.268170  |
| H  | -0.562099 | 3.656447  | -0.067144 |
| H  | 0.932385  | 2.402618  | 1.875702  |
| H  | 2.871711  | 2.414206  | 0.428553  |
| H  | 2.810626  | 1.492932  | -1.854037 |
| H  | 0.973964  | 0.375019  | -2.782264 |
| H  | -1.305148 | 0.932851  | -2.614988 |
| H  | -2.426201 | 2.051105  | -0.813541 |
| O  | 0.615367  | -0.503602 | 2.866068  |
| O  | 3.988103  | -0.976272 | 0.382227  |
| O  | 0.867468  | -2.290209 | -1.416852 |
| O  | -2.823765 | 0.653844  | 2.056888  |
| O  | -3.228031 | -1.289428 | -2.176769 |
| O  | -1.442659 | -3.014757 | 1.013399  |

29

TS-2-3 with C7H8, el energy= -1197.49476137

|    |          |           |           |
|----|----------|-----------|-----------|
| C  | 1.720505 | -0.881744 | 4.187747  |
| C  | 1.768725 | 0.879345  | 0.118185  |
| C  | 3.365374 | -0.881420 | -0.642469 |
| C  | 4.319633 | 0.723908  | 1.135731  |
| C  | 1.316324 | -0.376670 | 2.795104  |
| C  | 3.174923 | 2.619110  | 2.318932  |
| C  | 2.577770 | 1.758864  | 4.496553  |
| C  | 5.154558 | 1.514250  | 3.591905  |
| C  | 1.242428 | -1.382381 | 1.760261  |
| C  | 2.383996 | -2.208019 | 1.557871  |
| C  | 3.683139 | -1.831181 | 2.072872  |
| C  | 4.057260 | -1.125552 | 3.317284  |
| C  | 3.206238 | -0.702397 | 4.349017  |
| Fe | 2.809128 | -0.314415 | 0.907589  |
| Fe | 3.502093 | 1.085423  | 3.127512  |
| H  | 1.177781 | -0.308758 | 4.959638  |
| H  | 1.433737 | -1.950028 | 4.306373  |



|   |          |           |           |
|---|----------|-----------|-----------|
| H | 0.527778 | 0.384761  | 2.777768  |
| H | 0.353023 | -1.520373 | 1.133298  |
| H | 2.346369 | -3.020130 | 0.821596  |
| H | 4.521918 | -2.378035 | 1.623585  |
| H | 5.131822 | -1.155210 | 3.533277  |
| H | 3.644197 | -0.536487 | 5.341061  |
| O | 1.074945 | 1.644579  | -0.417374 |
| O | 3.736113 | -1.254269 | -1.682278 |
| O | 5.324038 | 1.128588  | 0.657288  |
| O | 2.947758 | 3.641938  | 1.813730  |
| O | 2.140532 | 2.319189  | 5.423160  |
| O | 6.205896 | 1.868118  | 3.945783  |

17

TMS, el energy= -163.340740233

|    |           |           |           |
|----|-----------|-----------|-----------|
| Si | -0.000000 | -0.000000 | -0.000000 |
| C  | 0.708611  | -1.359138 | -1.120902 |
| C  | -1.222033 | 1.063882  | -0.990250 |
| C  | 1.414391  | 1.092364  | 0.641908  |
| C  | -0.900969 | -0.797109 | 1.469244  |
| H  | 1.425506  | -1.996923 | -0.571196 |
| H  | -0.092976 | -2.013327 | -1.511258 |
| H  | 1.240585  | -0.925061 | -1.987773 |
| H  | -1.652671 | 1.866286  | -0.362888 |
| H  | -0.725612 | 1.542579  | -1.854716 |
| H  | -2.059173 | 0.454313  | -1.378201 |
| H  | 1.959361  | 1.571585  | -0.192501 |
| H  | 1.032303  | 1.895292  | 1.299326  |
| H  | 2.144282  | 0.499723  | 1.224076  |
| H  | -1.325694 | -0.028975 | 2.141898  |
| H  | -1.732197 | -1.440948 | 1.126585  |
| H  | -0.213715 | -1.424544 | 2.066648  |
